# Supplementary material for: Matrine alleviates cisplatin‐induced acute kidney injury by inhibiting mitochondrial dysfunction and inflammation via SIRT3/OPA1 pathway
Source: PubMed Central journal article supplement (PMC9258713; doi:10.1111/jcmm.17398), 2022-06-01

Fig. S5

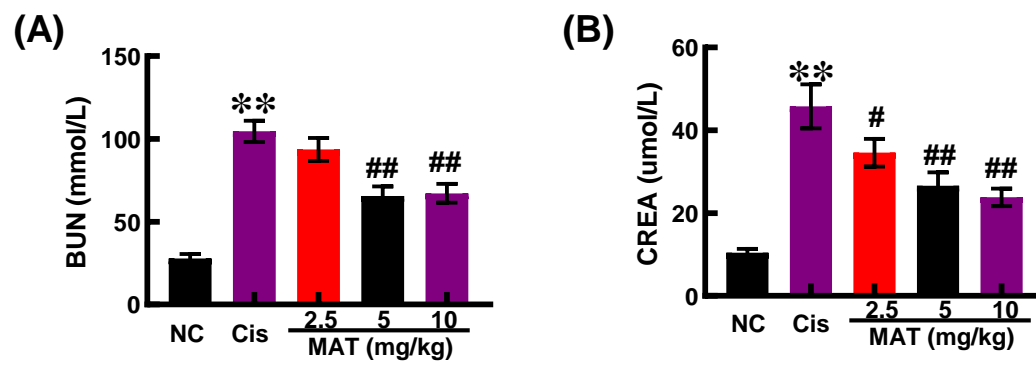

Supplement: JCMM-26-3702-s007.pdf [file JCMM-26-3702-s007.pdf]
